# Supplementary material for: Fourth Dose of mRNA COVID-19 Vaccine Transiently Reactivates Spike-Specific Immunological Memory in People Living with HIV (PLWH)
Source: MDPI journal article supplement (doi:10.3390/biomedicines10123261), 2022-12-15
Supplement: s1 [file s1]

## Supplementary Appendix

### Table of Contents

**Supplemental Table 1.** List of all fluorochrome-conjugated antibodies used for flow cytometric analysis of immunophenotyping of lymphoid cell subsets.

**Supplemental Table 2.** List of all fluorochrome-conjugated antibodies used for flow cytometric analysis of antigen-specific and polyclonal T cells.

**Supplemental Table 3.** List of all fluorochrome-conjugated antibodies used for flow cytometric analysis of antigen-specific B cells.

**Supplemental Table 4.** List of all fluorochrome-conjugated antibodies used for flow cytometric analysis of antigen-specific B cells.

**Supplemental Figure 1.** Gating strategy for immunophenotyping of lymphoid cell subsets.

**Supplemental Figure 2.** Gating strategy for the identification of SARS-CoV-2-specific T cells.

**Supplemental Figure 3.** Gating strategy for the identification of Spike-specific B cells.

**Supplemental Table 1.** List of all fluorochrome-conjugated antibodies used for flow cytometric analysis of immunophenotyping of lymphoid cell subsets.

| Antigen | Fluorochrome | Clone    | Company      |
|---------|--------------|----------|--------------|
| HLA-DR  | FITC         | L243     | BDBioscience |
| CD56    | PE           | NCAM16.2 | BDBioscience |
| CD16    | PerCP 5.5    | 3G8      | BDBioscience |
| CD4     | PE-Cy7       | SK3      | BDBioscience |
| CD19    | APC          | SJ25C1   | BDBioscience |
| CD8     | APC-H7       | SK1      | BDBioscience |
| CD3     | V450         | ICHT1    | BDBioscience |
| CD45    | V500         | 2D1      | BDBioscience |

**Supplemental Table 2.** List of all fluorochrome-conjugated antibodies used for flow cytometric analysis of antigen-specific and polyclonal T cells.

| Antigen       | Fluorochrome                | Clone       | Company      |
|---------------|-----------------------------|-------------|--------------|
| TNF- $\alpha$ | FITC                        | 6401.1111 B | BDBioscience |
| CD154         | PE                          | TRAP1       | BDBioscience |
| CD3           | PerCP                       | SK7         | BDBioscience |
| CD4           | PECy-7                      | SK3         | Invitrogen   |
| CD8           | SB600                       | SK1         | eBioscience™ |
| IL-2          | APC                         | MQ1-17H12   | BDBioscience |
| IFN- $\gamma$ | Pacific Blue                | B27         | BioLegend    |
| L/D           | Fixable Viability Stain 780 |             | BDBioscience |

**Supplemental Table 3.** List of all fluorochrome-conjugated antibodies used for flow cytometric analysis of antigen-specific B cells.

| Antigen | Fluorochrome   | Clone        | Company  |
|---------|----------------|--------------|----------|
| CD19    | APC-Vio770     | LT19         | Miltenyi |
| CD27    | VioBright FITC | M-T271       | Miltenyi |
| IgA     | VioGreen       | IS11-8E10    | Miltenyi |
| IgG     | VioBlue        | IS11-3B2.2.3 | Miltenyi |
| CD14    | PerCP          | TÜK4         | Miltenyi |
| IgM     | APC            | PJ2-22H3     | Miltenyi |
| CD3     | PerCP          | BW264/56     | Miltenyi |
| 7AAD    |                |              | Miltenyi |
| Spike   | PE             |              | Miltenyi |
| Spike   | PE-Vio770      |              | Miltenyi |

**Supplemental Table 4.** List of all fluorochrome-conjugated antibodies used for flow cytometric analysis of antigen-specific B cells.

| Antigen                | Fluorochrome   | Clone    | Company  |
|------------------------|----------------|----------|----------|
| CD19                   | APC-Vio770     | LT19     | Miltenyi |
| CD27                   | VioBright FITC | M-T271   | Miltenyi |
| Wuhan WT Spike         | APC            |          | Miltenyi |
| Wuhan WT Spike         | VioBlue        |          | Miltenyi |
| CD14                   | PerCP          | TÜK4     | Miltenyi |
| CD3                    | PerCP          | BW264/56 | Miltenyi |
| 7AAD                   |                |          | Miltenyi |
| Spike Omicron B1.1.529 | PE             |          | Miltenyi |
| Spike Omicron B1.1.529 | PE-Vio770      |          | Miltenyi |

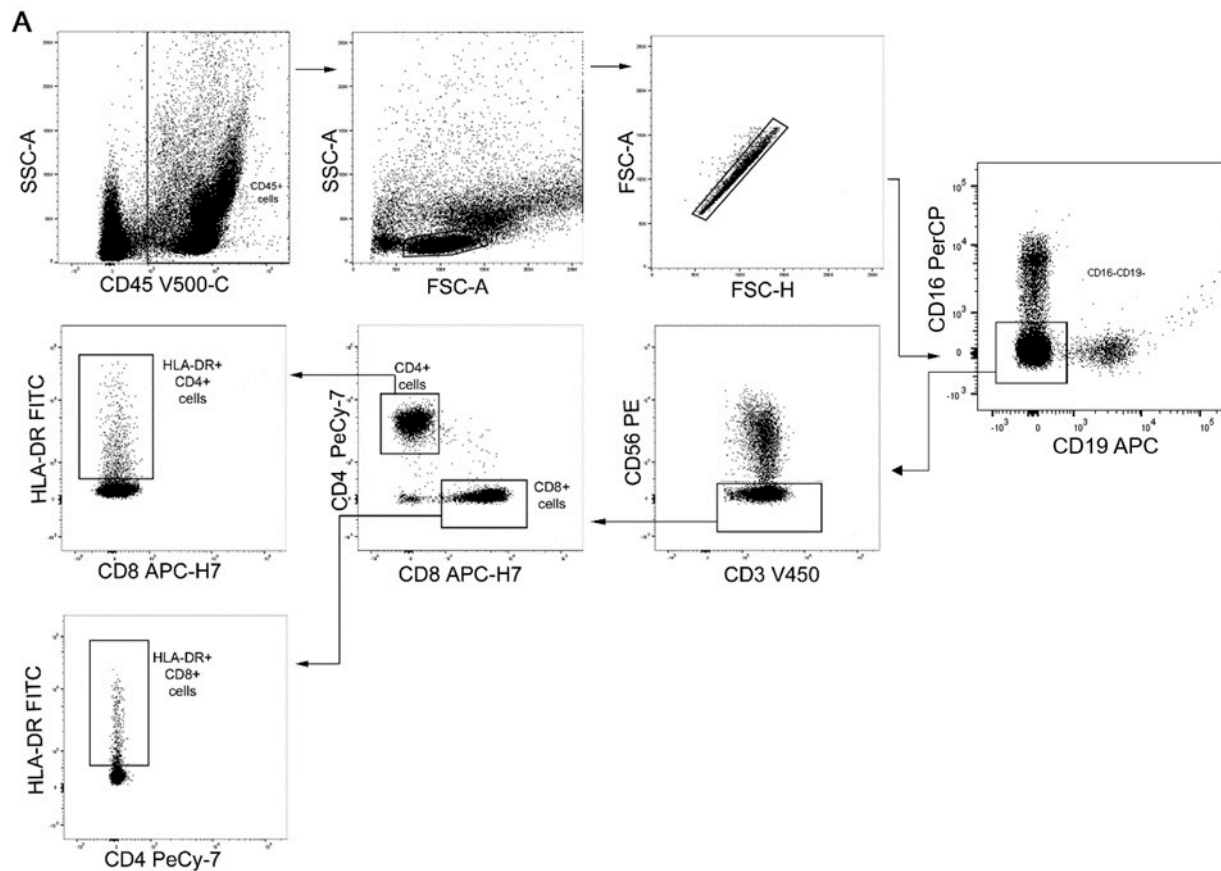

**Supplemental Figure 1.** Gating strategy for immunophenotyping of lymphoid cell subsets.

(A) PBMCs were gated based on physical parameter SSC and CD45 surface expression, lymphocytes were then gated basing on physical parameters (SSC, FSC). Doublets were removed using FSC-A and FSC-A parameters. CD16-CD19- and CD56-CD3+ cells were identified. In the resulting CD3+ population, CD4+ and CD8+ T lymphocytes were identified. Among these, we identified HLA-DR expressing cells.

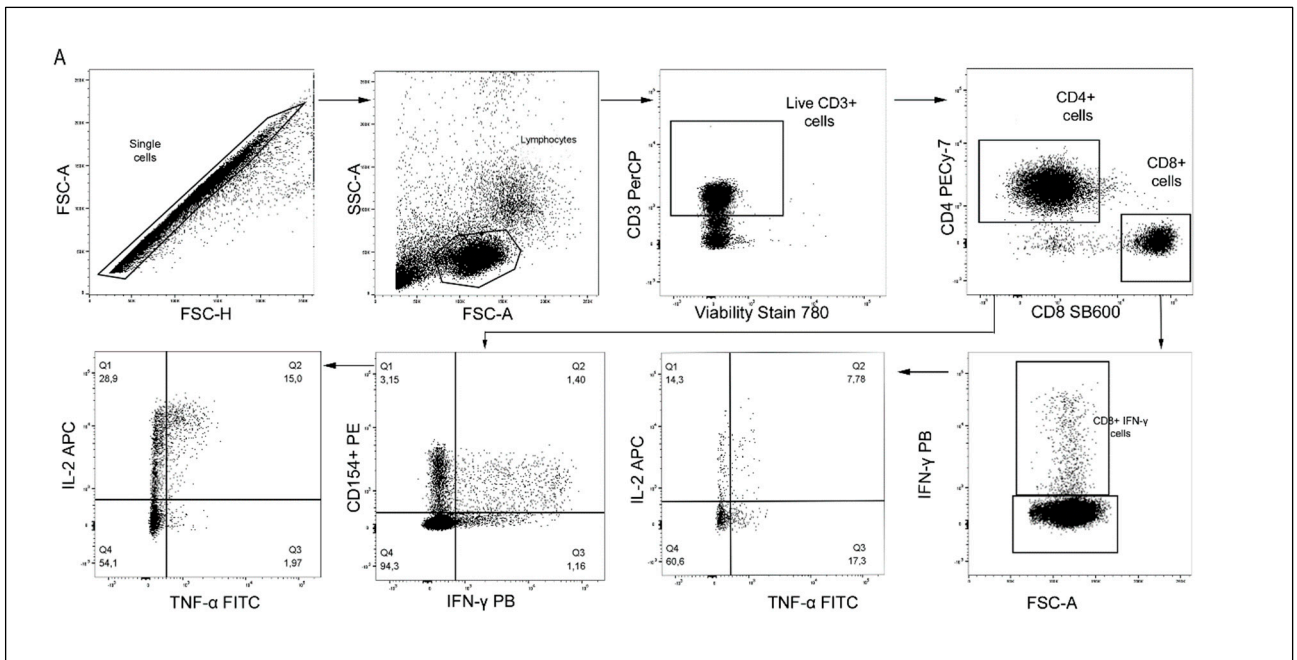

**Supplemental Figure 2.** Gating strategy for the identification of SARS-CoV-2-specific T cells.

(A) Doublets were removed using FSC-A and FSC-A parameters and lymphocytes were gated based on physical parameters (FSC-SSC). Dead cells were excluded using viability stain 780. T cells were identified as CD3+. We then identified CD4+ and CD8+ T cells. CD4+ T cells were evaluated for CD154, IFN- $\gamma$ , TNF- $\alpha$  and IL-2 expression. CD8+ T cells were evaluated for IFN- $\gamma$ , TNF- $\alpha$  and IL-2 expression.

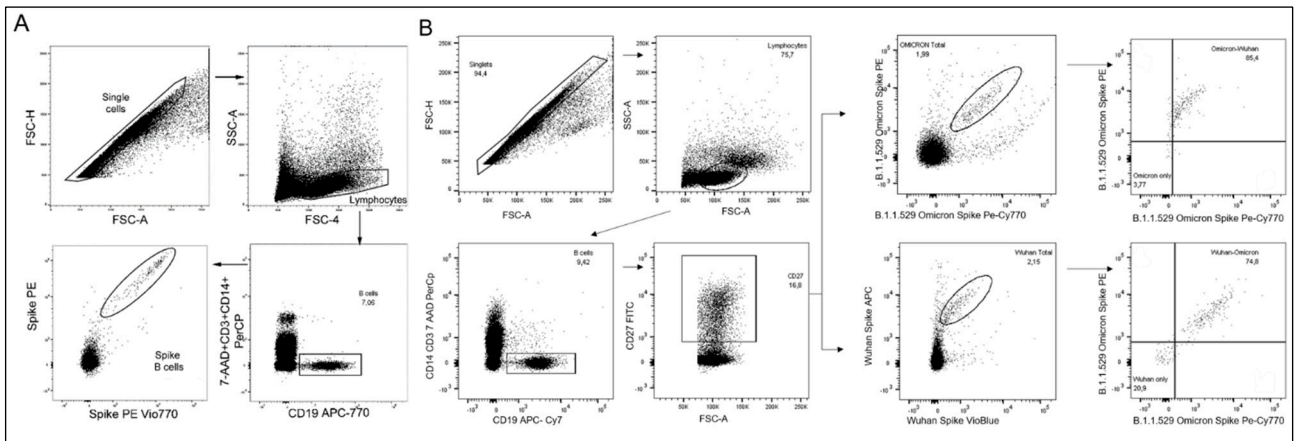

**Supplemental Figure 3.** Gating strategy for the identification of Spike-specific B cells.

(A) Doublets were removed using FSC-A and FSC-A parameters and lymphocytes were gated based on physical parameters (FSC-SSC). PerCP was used as dump channel for the exclusion of dead cells (7AAD), CD3+ T cells and CD14 monocytes. B cells were identified as CD19+. B cells binding PE- and PE Vio770-conjugated spike protein were then identified as Wuhan (WT) Spike-specific. (B) Doublets were removed using FSC-A and FSC-A parameters and lymphocytes were gated based on physical parameters (FSC-SSC). PerCP was used as dump channel for the exclusion of dead cells (7AAD), CD3+ T cells and CD14 monocytes. Memory B cells were identified as CD19+CD27+. B cells binding PE- and PE Vio770-conjugated spike protein were then identified as B.1.1.529 (Omicron) Spike-specific and B cells binding APC- and Pacific Blue-conjugated Spike protein were then identified as Wuhan (WT) Spike-specific.
